# Supplementary material
Source: ML conference proceedings conference paper supplement (https://proceedings.neurips.cc/paper_files/paper/2020/hash/fdd5b16fc8134339089ef25b3cf0e588-Abstract.html)
Supplement: Supplementary file [file fdd5b16fc8134339089ef25b3cf0e588-Supplemental.pdf]

---

# Supplementary Material for: Learning to Decode: Reinforcement Learning for Decoding of Sparse Graph-Based Channel Codes

---

## S.1 Proof of Theorem 1

The proofs are ordered according to the claims in the theorem as follows.

1. There are  $p$  VN neighbors of a CN  $c \in C_u$ , and none of these VN neighbors can share another CN neighbor due to the absence of 4-cycles. Thus, the number of VNs in  $\mathcal{N}_V(c)$  that have no neighbors outside of  $C_u$  is at most  $(z-1)/2$  (each of these VNs has two other neighbors in the remaining  $z-1$  CNs of  $C_u$ , and all are distinct). Thus, there are at least  $p - (z-1)/2$  VNs adjacent to  $c$  that have at least one neighbor outside of  $C_u$ . This is true for all choices of  $c$ . Since we may be counting each of these VNs up to two times, there are at least  $(p - [(z-1)/2])z/2$  VNs in  $W$ . The result follows.
2. If all the rows corresponding to the CNs of cluster  $C_u$  are in the same row group, then no two CNs in  $C_u$  will have any VNs in common. Hence, each VN in  $\mathcal{N}_V(C_u)$  must also be adjacent to  $\bar{C}_u$ , implying that  $\mathcal{N}_V(C_u)$  is a CCS with  $|\mathcal{N}_V(C_u)| = |C_u|p = zp$ .
3. Suppose that the CNs in  $C_u$  form triples, and let  $\phi = \{\{c_1, c_2, c_3\}, \dots, \{c_{z-2}, c_{z-1}, c_z\}\}$ ,  $|\phi| = z/3$ , be a set of all these triples. Suppose that each CN triple in  $\phi$  is associated to a non-overlapping 6-cycle. Since, in this case, there will be  $|\phi|$  non-overlapping 6-cycles in the Tanner graph induced by  $C_u \cup \mathcal{N}_V(C_u)$ , and each 6-cycle has 3 VNs, the number of VNs that have degree 2 with respect to  $C_u$  will be  $|\phi| \times 3 = z$ . Note that there are  $zp$  edges emanating from  $C_u$  since each CN degree is  $p$ . Hence, in the worst case, there will be  $zp - z$  distinct VNs in  $\mathcal{N}_V(C_u)$ , which is also a CCS since each of these degree 3 VNs are also connected to  $\bar{C}_u$ .  $\square$

## S.2 Algorithm 1

---

**Algorithm 1:** MAB-NS for LDPC codes

---

**Input :**  $\mathbf{L}, \mathbf{H}$

**Output:** reconstructed signal

```

1 Initialization:
2    $\ell \leftarrow 0$ 
3    $m_{c \rightarrow v} \leftarrow 0$  // for all CN to VN messages
4    $m_{v \rightarrow c} \leftarrow L_v$  // for all VN to CN messages
5    $\hat{\mathbf{L}}_\ell \leftarrow \mathbf{L}$ 
6    $\hat{\mathbf{S}}_\ell \leftarrow \mathbf{H}\hat{\mathbf{L}}_\ell$ 
7   foreach  $a \in [[m]]$  do
8      $s_\ell^{(a)} \leftarrow g_M(\hat{s}_\ell^{(a)})$  //  $M$ -level quantization
9   end
   // decoding starts
10  if stopping condition not satisfied or  $\ell < \ell_{\max}$  then
11     $s \leftarrow$  index of  $\mathbf{S}_\ell$ 
12    select CN  $a$  according to an optimum scheduling policy
13    foreach VN  $v \in \mathcal{N}(a)$  do
14      compute and propagate  $m_{a \rightarrow v}$ 
15      foreach CN  $c \in \mathcal{N}(v) \setminus a$  do
16        compute and propagate  $m_{v \rightarrow c}$ 
17      end
18       $\hat{L}_\ell^{(v)} \leftarrow \sum_{c \in \mathcal{N}(v)} m_{c \rightarrow v} + L_v$  // update LLR of  $v$ 
19    end
20    foreach CN  $j$  that is a neighbor of  $v \in \mathcal{N}(a)$  do
21       $\hat{s}_\ell^{(j)} \leftarrow \sum_{v' \in \mathcal{N}(j)} \hat{L}_\ell^{(v')}$ 
22       $s_\ell^{(j)} \leftarrow g_M(\hat{s}_\ell^{(j)})$  // update syndrome  $\mathbf{S}_\ell$ 
23    end
24     $\ell \leftarrow \ell + 1$  // update iteration
25  end

```

---

## S.3 Details of Algorithm 2

---

### Algorithm 2: Clustered Q-learning

---

**Input** :  $\mathcal{L}, \mathbf{H}$   
**Output**: Estimated  $Q_{\ell_{\max}}(s_u, a_u)$  for all  $u$

- 1 Initialization:  $Q_0(s_u, a_u) \leftarrow 0$  for all  $s_u, a_u$  and  $u$
- 2 **for each**  $\mathbf{L} \in \mathcal{L}$  **do**
- 3      $\ell \leftarrow 0$
- 4      $\hat{\mathbf{L}}_\ell \leftarrow \mathbf{L}$
- 5      $\hat{\mathbf{S}}_\ell \leftarrow \mathbf{H}\hat{\mathbf{L}}_\ell$
- 6     **foreach**  $a \in [[m]]$  **do**
- 7          $s_\ell^{(a)} \leftarrow g_M(\hat{s}_\ell^{(a)})$  //  $M$ -level quantization
- 8     **end**
- 9     **while**  $\ell < \ell_{\max}$  **do**
- 10         schedule CN  $a_u$  according to an  $\epsilon$ -greedy approach
- 11         select  $u$  as cluster index of CN  $a_u$
- 12          $\mathbf{S}_\ell^{(u,z)} \leftarrow s_\ell^{(j_1)}, s_\ell^{(j_2)}, \dots, s_\ell^{(j_z)}$  // CN indices  $j_1, j_2, \dots, j_z \in \{0, \dots, m-1\}$  are in ascending order for MQC, and randomly ordered for MQR. For MQO, their ordering depends on the underlying cluster  $\tilde{C}_u^*$
- 13          $s_u \leftarrow$  index of  $\mathbf{S}_\ell^{(u,z)}$
- 14         **foreach** VN  $v \in \mathcal{N}(a_u)$  **do**
- 15             compute and propagate  $m_{a_u \rightarrow v}$
- 16             **foreach** CN  $c \in \mathcal{N}(v) \setminus a_u$  **do**
- 17                 compute and propagate  $m_{v \rightarrow c}$
- 18             **end**
- 19              $\hat{L}_\ell^{(v)} \leftarrow \sum_{c \in \mathcal{N}(v)} m_{c \rightarrow v} + L_v$  // update LLR of  $v$
- 20         **end**
- 21         **foreach** CN  $j$  that is a neighbor of  $v \in \mathcal{N}(a_u)$  **do**
- 22              $\hat{s}_\ell^{(j)} \leftarrow \sum_{v' \in \mathcal{N}(j)} \hat{L}_\ell^{(v')}$
- 23              $s_\ell^{(j)} \leftarrow g_M(\hat{s}_\ell^{(j)})$  // update syndrome  $\mathbf{S}_\ell$
- 24         **end**
- 25          $s'_u \leftarrow$  index of updated  $\mathbf{S}_\ell^{(u,z)}$
- 26          $R_\ell(s_u, a_u, s'_u) \leftarrow$  highest residual of CN  $a_u$
- 27         compute  $Q_{\ell+1}(s_u, a_u)$
- 28          $\ell \leftarrow \ell + 1$  // update iteration
- 29     **end**
- 30 **end**

---
